1                   How many ecological niches are defined  
2                   by the superabundant marine microbe  
3                                   *Prochlorococcus*?

4  
5 Miriam Miyagi<sup>1,#</sup>, Maïke Morrison<sup>1,‡</sup>, and Mark Kirkpatrick<sup>1,\*</sup>

6  
7 <sup>1</sup>Department of Integrative Biology, University of Texas, Austin, Texas, United States  
8                   of America

9 # Current address: Department of Organismic and Evolutionary Biology, Harvard  
10                   University, Cambridge, Massachusetts, United States of America

11 ‡ Current address: Department of Biology, Stanford University, Stanford, California,  
12                   United States of America

13 \* Corresponding author  
14                   Email: [kirkp@mail.utexas.edu](mailto:kirkp@mail.utexas.edu)

15  
16 *Running Title:* How many *Prochlorococcus* ecotypes?

17  
18  
19 The authors declare they have no competing interests.

20

## 21 ABSTRACT

22 Determining the identities, frequencies, and memberships of ecotypes in  
23 *Prochlorococcus* and other superabundant microbes (SAMs) is essential to studies of  
24 their evolution and ecology. This is challenging, however, because the extremely  
25 large population sizes of SAMs likely cause violations of foundational assumptions  
26 made by standard methods used in molecular evolution and phylogenetics. Here we  
27 present a tree-free likelihood method to identify ecotypes, which we define as  
28 populations with genome sequences whose high similarity is maintained by  
29 purifying selection. We applied the method to 96 genomes of the superabundant  
30 marine cyanobacterium *Prochlorococcus* and find that this sample is comprised of  
31 about 24 ecotypes, substantially more than the five major ecotypes that are  
32 generally recognized. The method presented here may prove useful with other  
33 superabundant microbes.

34

## 35 INTRODUCTION

36 With densities of up to  $10^6$ /ml of seawater and a global census size of some  $10^{27}$   
37 cells, the cyanobacterium *Prochlorococcus marinus* is the Earth's most abundant  
38 photosynthetic organism (1). It is also among the most ecologically important:  
39 these microbes are responsible for some 10% of atmosphere's oxygen (2).

40 The taxon *Prochlorococcus* encompasses multiple ecotypes that are  
41 distinguished by physiology, genomic features, and the environments in which they  
42 live (e.g. (3-11)). The number, frequencies, and memberships of these ecotypes,  
43 however, is not well understood. This situation is partly the result of the differing  
44 criteria used to delimit the ecotypes and estimate their phylogenetic relations:  
45 nucleotide or amino acid identity (e.g. (3, 7, 12)), physiology (13, 14), likelihood (15-  
46 17), neighbor joining (7, 18), parsimony (19), and the frequency of recombination  
47 (20).

48 Having accurate definitions for the ecotypes is important for several reasons.  
49 It is of great interest to predict how *Prochlorococcus* and other superabundant  
50 photosynthetic microbes will respond to climate change. The accuracy of current  
51 models (1, 21-23) might be increased by explicitly recognizing the ecological and  
52 physiological substructure of *Prochlorococcus* (14). Understanding the molecular  
53 evolution of *Prochlorococcus* depends on appropriate definitions of genetic  
54 populations, but studies have used widely differing ones (12, 19, 24, 25).

55 Defining ecotypes in superabundant microbes presents several novel  
56 challenges. Current methods in molecular evolution and phylogeny assume that a  
57 certain class of genomic sites (e.g. synonymous site) evolve as selectively neutral,

58 and that each nucleotide variant descend from of a unique mutation. If there are  
59 selectively neutral mutations occurring at some genomic sites, however, the vast  
60 coalescence times implied by the huge population size suggest that these sites may  
61 be mutationally saturated, and all trace of phylogenetic history has been erased.  
62 There is further the question of whether effectively neutral mutations (that is, with  
63  $N_e s \ll 1$ ) even exist in the genome of an organism with the population size of  
64 *Prochlorococcus* (18). A recent study suggests  $N_e$  may in fact be only on the order of  
65  $10^7$ , or the number of cells than can be found in 10 ml of seawater (26). That  
66 conclusion, however, was based on the assumption that some sites in the genome  
67 are selectively neutral. Clearly there is need for molecular tools that are appropriate  
68 to the biology of SAMs.

69       Some intuition about the implications of the extreme population size is gained  
70 from Figure 1. It shows how nucleotide diversity ( $\pi$ ) varies with population size,  
71 selection, and drift. These are results from a toy model that is described in  
72 Supplemental Information 1. Although it is far too simplified to rely on for  
73 quantitative results, the qualitative outcomes are informative. For most of life on  
74 Earth, the product of population size and the per-base mutation rate ( $N_e \mu$ ) is much  
75 smaller than 1. In that realm, the evolution of a mutation will either be largely  
76 dominated by mutation and drift (if  $N_e s \ll 1$ ) or by mutation and selection (if  $N_e s$   
77  $\gg 1$ ). Standard methods for inferring the genetic boundaries of species and their  
78 phylogenetic relations rely on mutations in the first category (*e.g.* refs. (27, 28)).  
79 But when  $N_e \mu$  is much greater than 1, sites whose evolution is dominated by  
80 mutation and drift no longer occur. Instead, allele frequencies are either

81 determined by mutation rates alone (if  $N_e s$  is sufficiently small) or a balance  
82 between mutation and selection (if not). In either event, we do not have the class of  
83 mutations required by standard methods that aim to delimit populations and  
84 species, and to estimate the phylogenetic relations between them.

85 In this paper we introduce a new model for delimiting ecotypes in  
86 superabundant microbes that we call *TreeFree*. We use it to analyze 96 whole  
87 genome sequences and 101 internal transcribed spacer (ITS) sequences sampled  
88 from *Prochlorococcus* by Kashtan *et al.* (18). The basis for our approach is an  
89 operational definition of an ecotype as a population whose individuals experience  
90 such similar selection pressures that they have very similar genomes and (by  
91 implication) ecological function. This view of ecotypes has some similarity to  
92 Cohan's definition (29), but ours does not require periodic selective sweeps to  
93 homogenize the genetic variation within ecotypes since that can be accomplished by  
94 purifying selection alone.

95 The core assumption is that each ecotype is characterized by a reference  
96 genome sequence, and the rare departures from that sequence result from  
97 deleterious mutation (and sequencing errors). Under this hypothesis, any variation  
98 maintained by some form of balancing selection in effect results in multiple  
99 ecotypes that coexist by some form of niche partitioning.

100 Our method uses a likelihood approach to estimate the number of ecotypes  
101 and their frequencies, and there is an explicit model for the sources of genetic  
102 variation within ecotypes (mutation and sequencing error). No attempt is made to  
103 estimate the phylogenetic relations between the ecotypes: the method is tree-free.

104 The reference sequences for all the ecotypes appear in the likelihood function, but  
105 since those are not our main concern we average over uncertainties in those  
106 sequences using Markov Chain Monte Carlo (MCMC) (30).

107 We note that the term “ecotype” has been used in ways that differ from our  
108 definition by researchers working on *Prochlorococcus* and other microbes. In this  
109 paper, an ecotype refers to a group of cells that our analyses suggest belong to the  
110 same genetic unit (as described above). We use “clade” to refer to the groups of  
111 genomes recognized by Kashtan *et al.* (18). (Later we will introduce “population” to  
112 refer to other levels of clustering.)

113 To learn how results from *TreeFree* compare with those from conventional  
114 methods used to infer species boundaries with genomic data, we also analyzed the  
115 Kashtan data using Bayesian Phylogenetics and Phylogeography (BPP), a Bayesian  
116 method for delimiting species (or in our case, ecotypes) using the multispecies  
117 coalescent model (31, 32). As with other methods in molecular phylogenetics, BPP  
118 makes assumptions we suspect may be violated by *Prochlorococcus*. Notably, BPP  
119 assumes that genomic sites that differ between species (or ecotypes) are not  
120 mutationally saturated, and that there is strong recombination between sites.

121 Results from our new method suggest that there are many more ecotypes than  
122 are generally recognized by the community of *Prochlorococcus* workers and by BPP.  
123 We estimate that this sample of 96 genomes comprises about 24 ecotypes. Our  
124 method is many times more computationally efficient than BBP, and it can  
125 accommodate sequences of 1 Mb or more. This tool may be useful for exploring the  
126 ecological diversity in other superabundant microbes.

127

## 128 METHODS

### 129 The data

130 This study was inspired by Kashtan *et al.* (18), who collected partial genome  
131 sequences from 96 *Prochlorococcus* cells that were sampled from 2 ml of seawater  
132 at 60 m depth at a site in the mid-Atlantic during three dates in 2008 and 2009. In  
133 addition, we analyzed the RNA ITS (549 bp) that was sequenced from those 96 cells  
134 and from an additional five cells.

135 The genomes of *Prochlorococcus* ecotypes differ dramatically in their size and  
136 composition due to variation in the presence or absence of “flexible” genes. Since  
137 our method relies on sequence alignment, we focused exclusively on the 1 Mb “core”  
138 genome that is shared among all ecotypes and consists of about 1 400 genes. There  
139 are 307 432 SNPs. Of these, an unusually high fraction (21%) are triallelic or  
140 quadallelic, which is not surprising given the presence of multiple ecotypes.

141

### 142 *TreeFree*

143 We call our new method *TreeFree* because it estimates the genetic boundaries of  
144 ecotypes without estimating their phylogeny. At the heart of the algorithm is a  
145 model that calculates the probability of the observed genome sequences given four  
146 sets of parameters: the number and frequencies of ecotypes, the assignment of each  
147 genome in the sample to an ecotype, the reference genome sequence for each

148 ecotype, and the frequency of minor alleles at sites within ecotypes that result from  
149 deleterious mutation and sequencing error. Our main interest is in the first of these.

150       Given this model, one strategy might be to search for the parameters that  
151 maximize the likelihood (that is, the maximum likelihood estimates). Unfortunately,  
152 that strategy is not practical because of the very large number of parameters,  
153 notably the reference genome sequences for all the ecotypes. For example, a  
154 statistical model for a dataset with 10 ecotypes with genomes that have  $10^5$  SNPs  
155 has  $10^6$  parameters to estimate. We therefore use Markov Chain Monte Carlo to  
156 sample the parameter space and obtain posterior probability densities for the  
157 parameters of interest. A technical challenge here is that we need to compare the  
158 likelihoods for models that include different numbers of ecotypes and therefore  
159 different numbers of parameters.

160       The following two sections outline the likelihood model and the MCMC  
161 algorithm. Details are given in Supplemental Information 2.

162

163 The likelihood model. The essence of the likelihood model is simple. For each  
164 genomic sequence in the sample, we consider the probability that it belongs to each  
165 proposed ecotype. For each of those ecotypes, we calculate the probability of the  
166 observed sequence, which is determined by the numbers of sites at which that  
167 sequence does and does not agree with the reference sequence for that ecotype.  
168 The probabilities for membership in each ecotype are added together to give the  
169 total likelihood for that sequence. The likelihoods for each sequence in the sample  
170 are multiplied together to arrive at the likelihood for all of the data, given the



171 parameters. This last step assumes that the individual genomes are independent  
172 samples.

173 We greatly simplify this model by making two strong assumptions. First, we  
174 assume that within an ecotype, the minor allele at each site has the same frequency  
175  $q$ . This assumption is plausible if purifying selection is sufficiently strong that the  
176 great majority of genomic sites fall into the mutation-selection domain shown in  
177 Figure 1 and if most minor alleles result from sequencing error rather than  
178 deleterious mutation. The latter assumption seems plausible since the sequencing  
179 error in these data is estimated to be  $10^{-4}$  per base pair (18) while the spontaneous  
180 mutation rate in *Prochlorococcus* is on the order of  $10^{-10}$  per base pair (26, 33).

181 Under these assumptions, the likelihood of the data is

182

$$183 \quad L = \prod_{i=1}^n \sum_{j=1}^J f_j (1 - q)^{m_{ij}} q^{K_i - m_{ij}}, \quad (1)$$

184

185 where  $n$  is the number of sequences in the sample,  $J$  is the proposed number of  
186 ecotypes,  $f_j$  is the frequency of ecotype  $j$ ,  $K_i$  is the total number of SNPs in sequence  $i$ ,  
187 and  $m_{ij}$  is the total number of matches across all genomic sites between the alleles in  
188 sequence  $i$  and those in the reference genome of ecotype  $j$ . Further details are given  
189 in Supplemental Information 2.

190

191 The MCMC implementation. We infer the ecotype structure in a way similar to the  
192 implementation of *structure* (34). For a given number of ecotypes, we alternate  
193 between Metropolis-Hastings steps in order to optimize the vector of ecotype

194 frequencies and Gibbs steps to estimate the reference sequences for all the ecotypes  
195 (see (35)).

196 We initiate that algorithm with  $J$  (the number of ecotypes) equal to  $n$  (the  
197 sample size), so that each genome is initially assigned to a different ecotype. We  
198 then decrement the number of ecotypes by one, removing the ecotype that causes  
199 the smallest change in the likelihood when it is omitted. After iterating this process  
200 down to a single ecotype, we take the maximum likelihood achieved within each  
201 Gibbs step. This likelihood is compared with the maximum likelihood reached in the  
202 previous Gibbs step using a likelihood ratio test. These steps are repeated until only  
203 a single ecotype remains. We then count the number of times that a Gibbs step  
204 results in a significant decrease in the likelihood (at  $p < 0.05$ ). This number is our  
205 estimate for the number of ecotypes in the sample.

206 The logic behind this algorithm is as follows. Whenever removing an ecotype  
207 causes a significant drop in the likelihood, we expect that this potential ecotype is in  
208 fact a real ecotype. Conversely, if removing an ecotype does not cause the likelihood  
209 to drop significantly, we interpret reject that potential ecotype as being a real one.

210 We found that using subsets of the genome produces smaller estimates of the  
211 numbers of ecotypes. This behavior is expected because the sensitivity of the  
212 likelihood scales with the length of the sequences.

213

214 Data analyzed. We found it was not feasible to run *TreeFree* on the full sequences.

215 We therefore analyzed the first 1% of the genome, and the first 10% of the genome.

216 Comparisons between these two analyses show how sensitive our method is to the  
217 amount of data.

218

## 219 **BPP**

220 We compared the results from our method with those obtained from Bayesian  
221 Phylogenetics and Phylogeography (BPP), a Bayesian method for delimiting species  
222 (or in our case, ecotypes) using the multispecies coalescent model (31, 32). We  
223 applied this method to the genomes sequenced from single cells of *Prochlorococcus*  
224 by Kashtan *et al.* (18). Ninety of these genomes come from what they refer to as  
225 ecotype cN2.

226 The BPP analysis proceeds as follows:

- 227 1. Each genome is assigned to a small “population” that is *a priori* assumed  
228 to belong to only one ecotype. A rooted “guide tree” is provided that  
229 gives an initial phylogeny for these populations. For this purpose, we  
230 used the phylogeny proposed by ref. (18) (see Fig. 2).
- 231 2. BPP uses a Markov Chain Monte Carlo (MCMC) algorithm that considers  
232 jumps to different guide tree topologies. A reversible-jump MCMC  
233 algorithm considers changes to ecotype delimitations by merging and  
234 splitting tips of the guide tree. This process iterates many times.
- 235 3. BPP outputs posterior probability distributions for several quantities,  
236 notably the total number of ecotypes and the assignments of each  
237 genotype to an ecotype.

238 BPP is unable to run using the entire whole genome data set. We therefore  
239 ran it on three subsets of the sequences: about 10% of the core genome (163 kb,  $n =$   
240 96), about 0.1% of the core genome (1.63 kb,  $n = 96$ ), and the rRNA ITS sequences  
241 (549 bp,  $n = 101$  sequences). Below we report the results from 12 distinct analyses  
242 that differ in the dataset used (a proportion of the core genome or the entire ITS  
243 region), the sequences that were included, and the assignment of sequences to  
244 populations (see Supplemental Information Table SI 3.1).

245 For many of our analyses, we focused on one or more ecotypes, initiating BPP  
246 with two or more prior populations from each ecotype. We then observed if BPP  
247 assigned these prior populations to their own ecotypes or merged several  
248 populations into the same ecotype. A more thorough discussion of our BPP  
249 implementation is included in the Supplemental Information 3, and details of 12  
250 selected analyses are given in Supplemental Information Tables SI 3.1 and SI 3.2.

251

## 252 RESULTS

### 253 **Results from *TreeFree***

254 Both *TreeFree* and BPP are Bayesian methods, so rather than providing single point  
255 estimates of parameters they return the probabilities associated with all possible  
256 outcomes. For brevity, in the text we will refer to the result that has the highest  
257 posterior probability. As described above, we used *TreeFree* to analyze subsets of  
258 0.1% and 10% of the sites in the core genome from all 96 individuals. Using 0.1% of  
259 the sites, the number of ecotypes with the highest posterior probability was about 7,

260 while with 10% of the sites it was about 24 ecotypes. More details of the results are  
261 presented in Figure 2 and Supplemental Information 4.

262 Notably, the 24 ecotypes identified in the larger dataset are not perfect subsets  
263 of the 7 ecotypes found using the smaller dataset. This suggests that additional  
264 sequence data are required not only to resolve ecotypes on finer scales, but also to  
265 determine whether ecotypes have been robustly identified. This outcome is not  
266 entirely surprising since smaller subsets of the genome can leave out genes that are  
267 critical to ecological differences between the ecotypes.

268

## 269 **BPP Results**

270 We conducted three main categories of analyses. First, we analyzed three  
271 subsets of the whole genome sequences: 100%, 10%, and 0.1% (Table 3.1, rows 1-  
272 3). Due to the computational limits of BPP, we could not analyze the full genome  
273 sequences of all 96 cells at once. Our analysis of the full genomes of nine individuals  
274 (four from clade C1, four from C2, and one from cN1-C9) identified three ecotypes  
275 which corresponded to Kashtan et al.'s three clades (Table 3.1, row 3). In order to  
276 analyze all 96 single-cell sequences at once, we restricted our analysis to either 10%  
277 or 0.1% of the full genomes. Here we initiated BPP by dividing each major clade into  
278 2 populations. Both analyses estimated that the sequences belonged to between 13  
279 and 14 ecotypes, with the 10% analysis placing slightly more weight on larger  
280 numbers of ecotypes and the 0.1% placing more weight on smaller numbers (Table  
281 3.1, rows 1-2). Second, we analyzed the 549 bp of the ITS rRNA sequences from 101  
282 genomes. We divided the four largest Kashtan clades (C1, C2, C3, and C4) into

283 multiple prior populations, and initiated BPP with the neighbor joining tree  
284 estimated by Kashtan *et al.* (2014) (shown in Figure 3). BPP merged the  
285 populations within each clade, resulting in 14 ecotypes (Fig 3; Supplemental Table  
286 SI 3.1, row 4). These are largely consistent with the ecotypes and clades recognized  
287 by Kashtan *et al.*, but two of the clades are split into a pair of ecotypes. Second, we  
288 used a random guide tree. BPP then merged the populations further, resulting in 10  
289 ecotypes (Supplemental Information Table SI 3.1, row 5).

290 Finally, we ran BPP on a reduced number of single-cell ITS sequences. By  
291 including fewer individuals in the analysis, we were able to initialize BPP with a  
292 larger number of populations, each with fewer individuals. These analyses allowed  
293 us to test the extent to which BPP over-split populations. When we assigned each of  
294 the 13 individuals in clade C3 to its own initial population, BPP merged all of them  
295 into a single ecotype. Similar outcomes obtained with other initial populations, with  
296 the exception that one initialization led to multiple ecotypes within clade C1  
297 (Supplemental Information SI 3.1, rows 8 – 12).

298 Overall, the ecotypes returned by BPP are largely consistent with the clades  
299 identified by Kashtan *et al.* (18) using neighbor joining. There are big differences,  
300 however, in the topology of the trees estimated by BPP using 10% of the sequences  
301 and neighbor joining using the whole genomes (Figure 4).

302

### 303 **Comparing *TreeFree* and BPP**

304 The most important difference between the results from *TreeFree* and BPP is the  
305 number of ecotypes estimated. Using 10% of the sequences, *TreeFree* estimates that  
306 there are roughly twice as many as does BPP (about 24 vs. about 12).

307 The two methods also disagreed on some of the assignments of the genomes to  
308 ecotypes (Figure 5). For example, *TreeFree* subdivided the C1 clade while BPP did  
309 not, and *TreeFree* cleanly divided the cN1-C9 and cN1 clades into separate ecotypes,  
310 rather than lumping them together. On the other hand, *TreeFree* lumped the UC and  
311 C5 clades into a single ecotype, which BPP did not.

312

### 313 **DISCUSSION**

314 Our findings suggest that the number of ecotypes in *Prochlorococcus* may be  
315 substantially larger than are commonly recognized. Early biochemical work  
316 suggested that *Prochlorococcus* had two ecotypes adapted to high and low light (36).  
317 The arrival of genome sequences, larger sample size, and additional environmental  
318 data lead to the recognition of six ecotypes (37), and many later studies accepted  
319 that conclusion. More recent work has subdivided these further. Kashtan *et al.*  
320 (2014) analyzed a sample of 1 381 sequences of the ITS. Using a cutoff of 99%  
321 sequence identity, they found that depending on the season between 130 and 200  
322 “backbone subpopulations” coexisted in their samples. Further, by subsampling  
323 different numbers of those sequences they showed that the true number of these  
324 subpopulations was certainly much larger.

325           Based on a new method called *TreeFree*, our analysis suggests the presence of  
326 about 24 ecotypes in the 96 whole genome sequences sampled by Kashtan *et al.*  
327 (2014). The method, which was designed to delimit ecotypes using genomic data  
328 from superabundant microbes, is based on an explicit statistical model. Our model  
329 makes the strong assumption that the effective strength of selection,  $N_e s$ , is much  
330 larger than one at all sites in the genome. While that assumption is plausible in the  
331 case of *Prochlorococcus*, we currently have no direct way to test it directly. Our  
332 conclusions are therefore provisional until the arrival of new statistical methods  
333 that can estimate quantities from patterns of molecular variation in superabundant  
334 microbes.

335           Properly defining ecotypes in *Prochlorococcus* could open up a new field of  
336 molecular evolution. The combined census population size estimated for  
337 *Prochlorococcus* is so vast that even ecotypes that are quite rare may have  
338 population sizes many orders of magnitude larger than those of abundant  
339 eukaryotes such as *Drosophila*. As we suggested in the Introduction, this situation  
340 could put *Prochlorococcus* in an unexplored region of population genetics parameter  
341 space. If  $N_e \mu$  is much larger than 1 throughout the genome, all sites will be  
342 mutationally saturated. That situation could free *Prochlorococcus* of most adaptive  
343 constraints. Adaptive sweeps of point mutations cease to occur because every  
344 possible mutation occurs many times in each generation, and most adaptation may  
345 happen by selection on standing variation (38). If  $N_e s$  is much larger than one at all  
346 sites, then no mutations evolve as if neutral, and genetic drift is virtually banished as



347 an evolutionary force. This situation would represent a strange and fascinating new  
348 world for evolutionary genetics.

349

## 350 ACKNOWLEDGEMENTS

351 We are very grateful to Colin Walker for assistance with programming. This  
352 research was supported by NSF grant DEB-1831730 and NIH grant R01-GM116853  
353 to MK.

354

## 355 COMPETING INTERESTS

356 The authors declare they have no competing financial interests.

357

## 358 DATA AVAILABILITY STATEMENT

359 All data analyzed in this study is in the public domain and can be located by  
360 consulting the references cited in the text. The scripts and code used in these  
361 analyses are available at [*a public repository to be specified before publication*].

362

## 363 REFERENCES

- 364 1. Flombaum P, Gallegos JL, Gordillo RA, Rincon J, Zabala LL, Jiao NAZ, et al.  
365 Present and future global distributions of the marine cyanobacteria  
366 *Prochlorococcus* and *Synechococcus*. Proceedings of the National Academy of  
367 Sciences of the USA. 2013;110(24):9824-9.
- 368 2. Munn C. *Marine Microbiology: Ecology and Applications*. Second ed. New York:  
369 Garland Science; 2011.
- 370 3. Johnson ZI, Zinser ER, Coe A, McNulty NP, Woodward EMS, Chisholm SW. Niche  
371 partitioning among *Prochlorococcus* ecotypes along ocean-scale environmental  
372 gradients. Science. 2006;311(5768):1737-40.
- 373 4. Scanlan DJ, Ostrowski M, Mazard S, Dufresne A, Garczarek L, Hess WR, et al.  
374 Ecological genomics of marine picocyanobacteria. Microbiol Mol Biol Rev.  
375 2009;73(2):249-99.
- 376 5. Malmstrom RR, Rodrigue S, Huang KH, Kelly L, Kern SE, Thompson A, et al.  
377 Ecology of uncultured *Prochlorococcus* clades revealed through single-cell  
378 genomics and biogeographic analysis. Isme Journal. 2013;7(1):184-98.
- 379 6. Biller SJ, Berube PM, Lindell D, Chisholm SW. *Prochlorococcus*: the structure and  
380 function of collective diversity. Nat Rev Microbiol. 2015;13(1):13-27.
- 381 7. Farrant GK, Dore H, Cornejo-Castillo FM, Partensky F, Ratin M, Ostrowski M, et  
382 al. Delineating ecologically significant taxonomic units from global patterns of  
383 marine picocyanobacteria. Proc Natl Acad Sci USA. 2016;113(24):E3365-E74.
- 384 8. Larkin AA, Blinebry SK, Howes C, Lin YJ, Loftus SE, Schmaus CA, et al. Niche  
385 partitioning and biogeography of high light adapted *Prochlorococcus* across  
386 taxonomic ranks in the North Pacific. Isme Journal. 2016;10(7):1555-67.
- 387 9. Larkin AA, Garcia CA, Ingoglia KA, Garcia NS, Baer SE, Twining BS, et al. Subtle  
388 biogeochemical regimes in the Indian Ocean revealed by spatial and diel  
389 frequency of *Prochlorococcus* haplotypes. Limnol Oceanogr. 2020;65:S220-S32.
- 390 10. Otero-Ferrer JL, Cermeno P, Bode A, Fernandez-Castro B, Gasol JM, Moran XAG,  
391 et al. Factors controlling the community structure of picoplankton in  
392 contrasting marine environments. Biogeosciences. 2018;15(20):6199-220.
- 393 11. Thompson AW, Kouba K. Differential activity of coexisting *Prochlorococcus*  
394 ecotypes. Frontiers in Marine Science. 2019;6:701.
- 395 12. Dore H, Farrant GK, Guyet U, Haguait J, Humily F, Ratin M, et al. Evolutionary  
396 mechanisms of long-term genome diversification associated with niche  
397 partitioning in marine picocyanobacteria. Frontiers in Microbiology.  
398 2020;11:567431.
- 399 13. Berube PM, Biller SJ, Kent AG, Berta-Thompson JW, Roggensack SE, Roache-  
400 Johnson KH, et al. Physiology and evolution of nitrate acquisition in  
401 *Prochlorococcus*. ISME Journal. 2015;9(5):1195-207.

- 402 14. Casey JR, Boiteau RM, Engqvist MKM, Finkel ZV, Li G, Liefer J, et al. Basin-scale  
403 biogeography of marine phytoplankton reflects cellular-scale optimization of  
404 metabolism and physiology. *Science Advances*. 2022;8(3).
- 405 15. Moore LR, Rocap G, Chisholm SW. Physiology and molecular phylogeny of  
406 coexisting *Prochlorococcus* ecotypes. *Nature*. 1998;393(6684):464-7.
- 407 16. Delmont TO, Eren AM. Linking pangenomes and metagenomes: the  
408 *Prochlorococcus* metapangenome. *Peerj*. 2018;6:e4320.
- 409 17. Larkin AA, Mackey KRM, Martiny AC. Marine cyanobacteria: *Prochlorococcus*  
410 and *Synechococcus*. *Encyclopedia of Ocean Sciences* 2019;1:569-73.
- 411 18. Kashtan N, Roggensack SE, Rodrigue S, Thompson JW, Biller SJ, Coe A, et al.  
412 Single-cell genomics reveals hundreds of coexisting subpopulations in wild  
413 *Prochlorococcus*. *Science*. 2014;344(6182):416-20.
- 414 19. Kettler GC, Martiny AC, Huang K, Zucker J, Coleman ML, Rodrigue S, et al.  
415 Patterns and implications of gene gain and loss in the evolution of  
416 *Prochlorococcus*. *PLoS Genet*. 2007;3(12):2515-28.
- 417 20. Bobay LM, Ellis BSH, Ochman H. ConSpeciFix: classifying prokaryotic species  
418 based on gene flow. *Bioinformatics*. 2018;34(21):3738-40.
- 419 21. Flombaum P, Wang WL, Primeau FW, Martiny AC. Global picophytoplankton  
420 niche partitioning predicts overall positive response to ocean warming. *Nature*  
421 *Geoscience*. 2020;13(2):116-20.
- 422 22. Xiao WP, Laws EA, Xie YY, Wang L, Liu X, Chen JX, et al. Responses of marine  
423 phytoplankton communities to environmental changes: New insights from a  
424 niche classification scheme. *Water Res*. 2019;166:115070.
- 425 23. Visintini N, Martiny AC, Flombaum P. *Prochlorococcus*, *Synechococcus*, and  
426 picoeukaryotic phytoplankton abundances in the global ocean. *Limnology and*  
427 *Oceanography Letters*. 2021;(in press).
- 428 24. Lynch M, Conery JS. The origins of genome complexity. *Science*.  
429 2003;302(5649):1401-4.
- 430 25. Gardon H, Biderre-Petit C, Jouan-Dufournel I, Bronner G. A drift-barrier model  
431 drives the genomic landscape of a structured bacterial population. *Mol Ecol*.  
432 2020;29(21):4143-56.
- 433 26. Chen ZY, Wang XJ, Song Y, Zeng QL, Zhang Y, Luo HW. *Prochlorococcus* have low  
434 global mutation rate and small effective population size. *Nat Ecol Evol*.  
435 2022;6(2):183-94.
- 436 27. Yang ZH, Rannala B. Bayesian species identification under the multispecies  
437 coalescent provides significant improvements to DNA barcoding analyses. *Mol*  
438 *Ecol*. 2017;26(11):3028-36.
- 439 28. Ronquist F, Teslenko M, van der Mark P, Ayres DL, Darling A, Hohna S, et al.  
440 MrBayes 3.2: Efficient Bayesian phylogenetic inference and model choice across  
441 a large model space. *Syst Biol*. 2012;61(3):539-42.

- 442 29. Cohan FM. What are bacterial species? *Annu Rev Microbiol.* 2002;56:457-87.
- 443 30. Diaconis P. The Markov chain Monte Carlo revolution. *Bulletin of the American*  
444 *Mathematical Society.* 2009;46(2):179-205.
- 445 31. Rannala B, Yang ZH. Bayes estimation of species divergence times and ancestral  
446 population sizes using DNA sequences from multiple loci. *Genetics.*  
447 2003;164(4):1645-56.
- 448 32. Yang ZH, Rannala B. Unguided species delimitation using DNA sequence data  
449 from multiple loci. *Mol Biol Evol.* 2014;31(12):3125-35.
- 450 33. Osburne MS, Holmbeck BM, Coe A, Chisholm SW. The spontaneous mutation  
451 frequencies of *Prochlorococcus* strains are commensurate with those of other  
452 bacteria. *Environmental Microbiology Reports.* 2011;3(6):744-9.
- 453 34. Pritchard JK, Stephens M, Donnelly P. Inference of population structure using  
454 multilocus genotype data. *Genetics.* 2000;155(2):945-59.
- 455 35. Geman S, Geman D. Stochastic relaxation, Gibbs distributions, and the Bayesian  
456 restoration of images. *IEEE Transactions on Pattern Analysis and Machine*  
457 *Intelligence.* 1984;6(6):721-41.
- 458 36. Morel A, Ahn YH, Partensky F, Vaultot D, Claustre H. *Prochlorococcus* and  
459 *Synechococcus*: A comparative study of their optical properties in relation to  
460 their size and pigmentation. *J Mar Res.* 1993;51(3):617-49.
- 461 37. Rocap G, Distel DL, Waterbury JB, Chisholm SW. Resolution of *Prochlorococcus*  
462 and *Synechococcus* ecotypes by using 16S-23S ribosomal DNA internal  
463 transcribed spacer sequences. *Appl Environ Microbiol.* 2002;68(3):1180-91.
- 464 38. Barton N. Understanding adaptation in large populations. *PLoS Genet.*  
465 2010;6(6):e1000987.
- 466
- 467

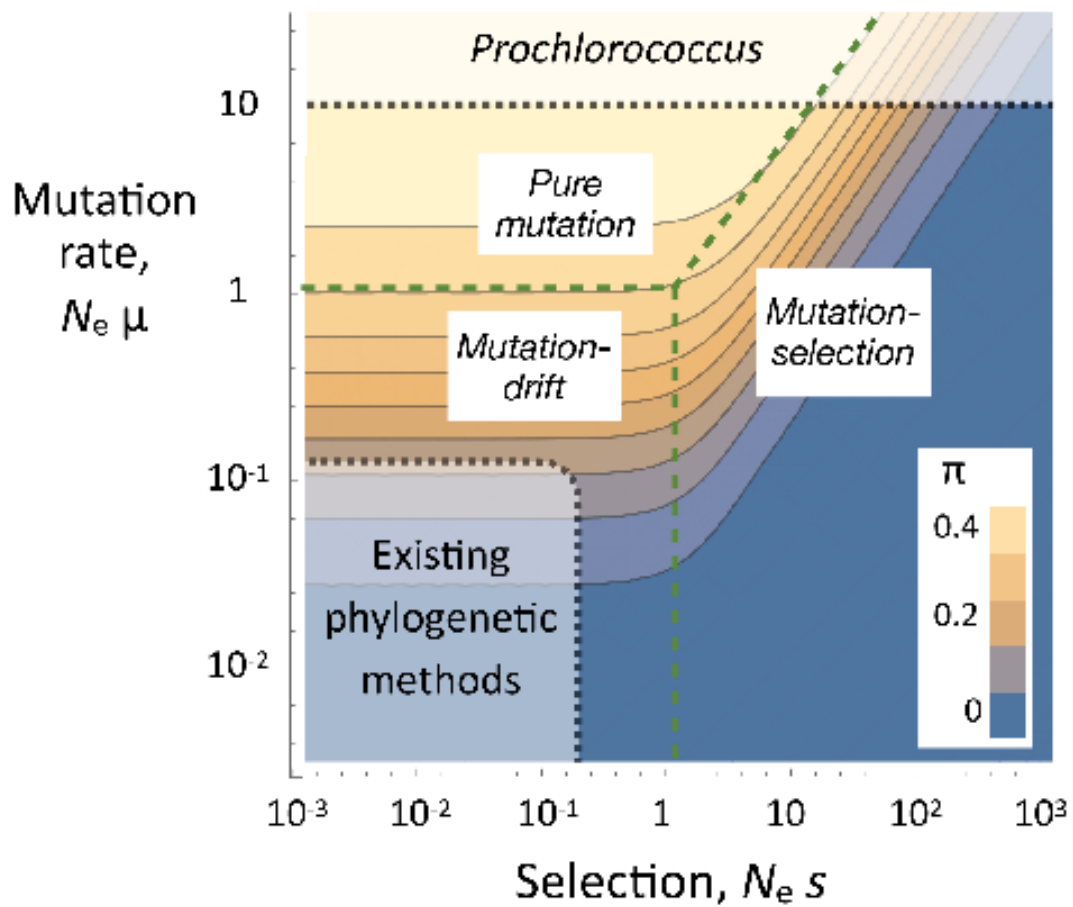

Fig. 1

468

469 **FIGURE 1** The dependence of nucleotide diversity ( $\pi$ ) on the scaled strength of  
470 selection ( $N_e s$ ) and mutation rate ( $N_e \mu$ ). The results are based on the toy model  
471 described in detail in Supplemental Information 1. The population size of  
472 *Prochlorococcus* is so vast that it may lie outside the region of parameter space  
473 assumed by existing phylogenetic methods.

474

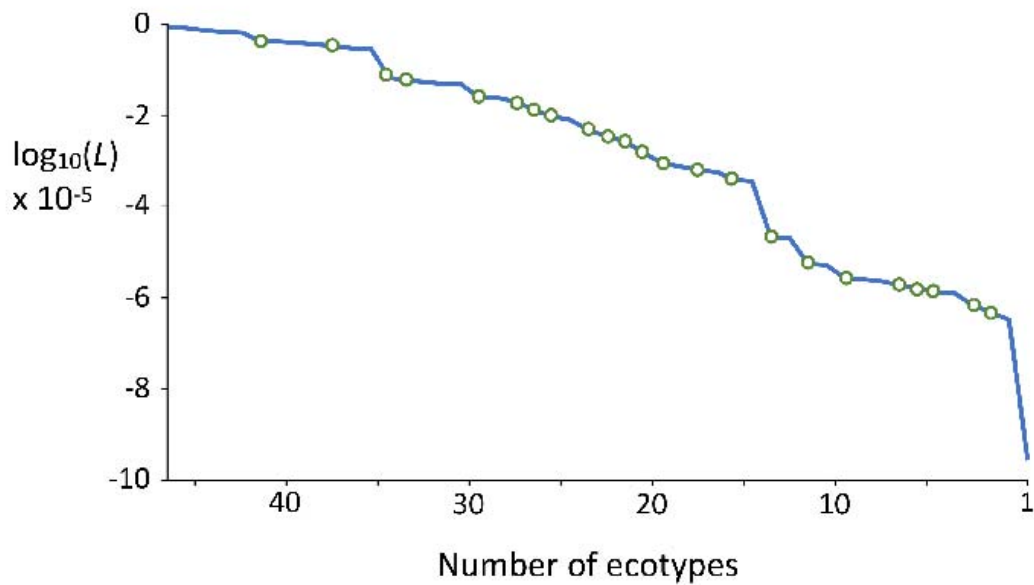

Fig. 2

475

476 **FIGURE 2** The log likelihood of ecotype partitions calculated by *TreeFree* using 10%  
477 of the genome. Moving to the right, in each Gibbs step the number of ecotypes is  
478 decreased by one, resulting in a decrease in the likelihood. Steps in which the  
479 decrease is significant ( $p < 0.05$  by a likelihood ratio test) are indicated by the  
480 circles.

481

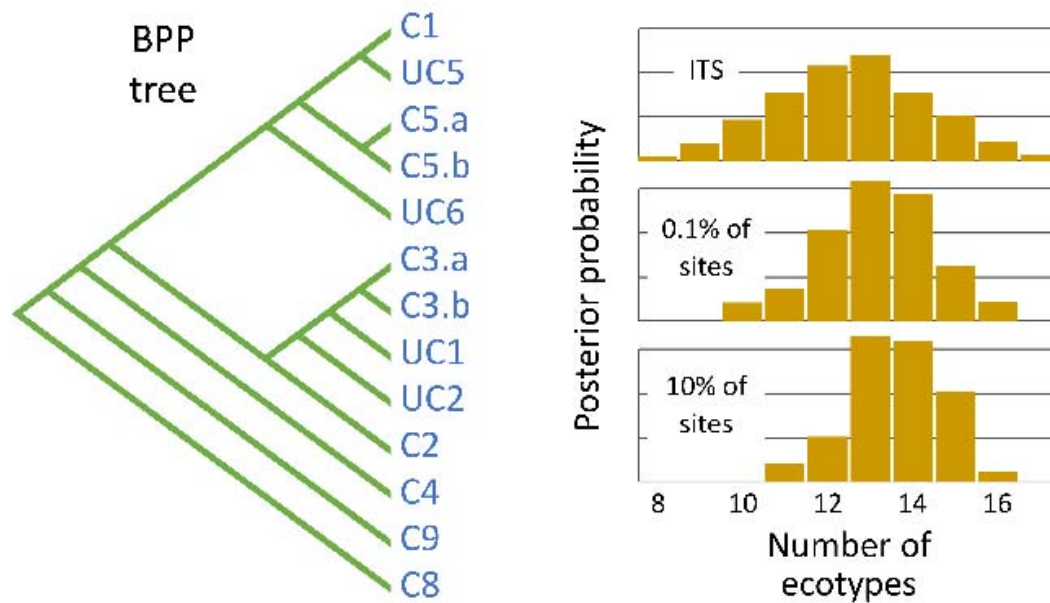

Fig. 3

482

483 **FIGURE 3** *Left:* The most probable phylogenetic tree estimated by BPP using 10%  
484 of the genome sequences. The ecotypes it identified are consistent with the clades  
485 identified by Kashtan *et al.* (18) with the exception of clades C3 and C5, which BPP  
486 subdivided into two ecotypes. For brevity, Kashtan *et al.*'s clades c9301-C8 and  
487 cN1-C9 are shown here as C8 and C9. Ecotypes UC1, UC2, and UC5 are represented  
488 by only a single genome. Other ecotypes are represented by between 2 and 53  
489 genomes; ecotype C1 is by far the most abundant. *Right:* The posterior  
490 distributions of probabilities for the numbers of ecotypes estimated by BPP using  
491 the ITS sequence alone, 0.1% of the genomes, and 10% of the genomes.

492

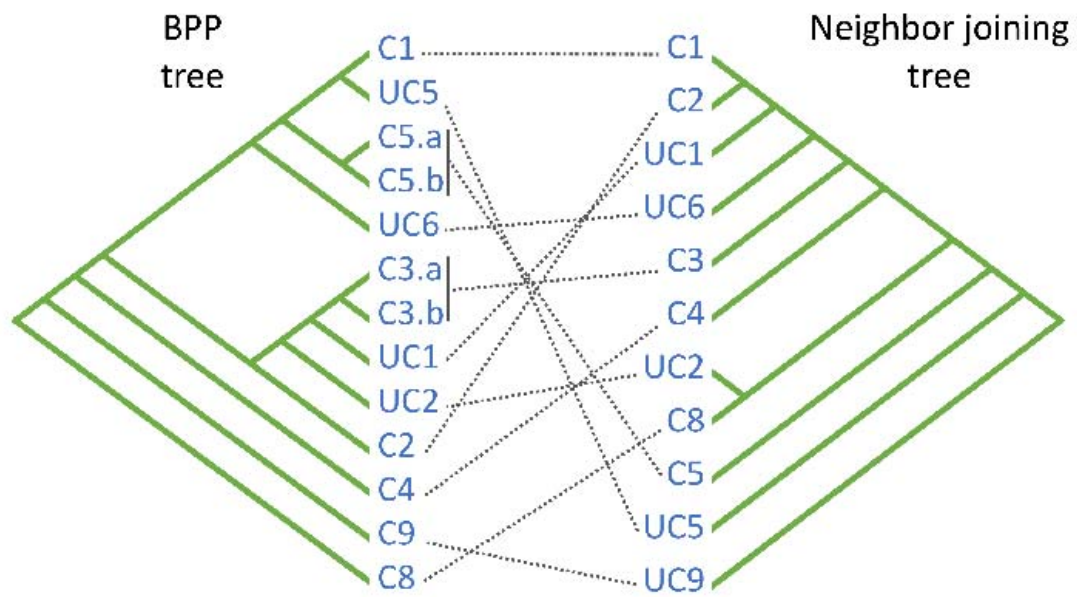

Fig. 4

493

494 **FIGURE 4** The relationship between the phylogenetic tree estimated by BPP using  
495 10% of the data and the neighbor joining tree estimated by Kashtan *et al.* (18) using  
496 the whole genomes.

497



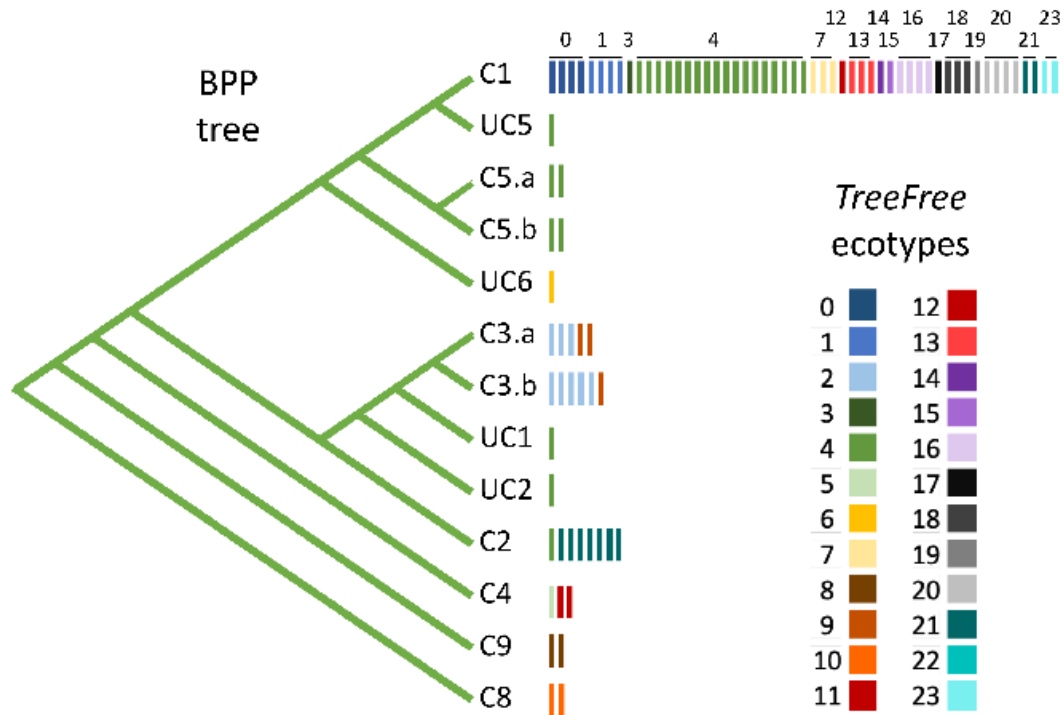

Fig. 5

498

499 **FIGURE 5** The relationship between the ecotypes estimated by *TreeFree* and BPP  
 500 using 10% of the sequences. At left are the phylogeny and ecotypes estimated by  
 501 BPP (see Figs. 3 and 4). To the right of the tips of the tree, each vertical rectangle  
 502 represents one of the genomes sequenced by Kashtan *et al.* (188), color coded to  
 503 show to which of the 24 ecotypes they most likely belong according to *TreeFree*.

504

505  
506  
507  
508  
509  
510  
511  
512  
513  
514  
515  
516

**Supplemental Information for:**

**How many ecological niches are defined  
by the superabundant marine microbe  
*Prochlorococcus*?**

Miriam Miyagi, Maike Morrison, and Mark Kirkpatrick

**Table of Contents:**

|                                            |         |
|--------------------------------------------|---------|
| <b>SI 1: Toy model for Figure 1</b>        | Page 2  |
| <b>SI 2: The <i>TreeFree</i> algorithm</b> | Page 4  |
| <b>SI 3: The BPP methods</b>               | Page 8  |
| <b>SI 4: Results of <i>TreeFree</i></b>    | Page 12 |
| <b>References</b>                          | Page 15 |

517  
518

519

## SI 1: Toy model used for Figure 1

520

521

522

523

524

525

526

527

528

529

530

531

532

533

$$\phi(p) = \frac{2^{(4 N_e \mu - 1)}}{\sqrt{\pi} \Gamma(4 N_e \mu) {}_0F_1\left(\frac{1}{2} + 2 N_e \mu, N_e^2 s^2\right)} [p(1-p)]^{2 N_e \mu - 1} \exp\{N_e s(2p - 1)\}, \quad (\text{A1.1})$$

534

535

536

537

538

$$E[\pi] = \int_0^1 2 p(1-p) \phi(p) dp = \frac{2 \mu I_a(N_e s)}{s I_b(N_e s)}, \quad (\text{A1.2})$$

539

540

541

542

543

544

Here we calculate the expected molecular diversity,  $\pi$ , at a site evolving under mutation, selection, and drift. The model is highly simplified and not intended to accurately capture the relevant biology. Further,  $\pi$  by no means gives a complete description of a site's evolution. The point of these calculations is simply to show that sites with the properties assumed by classical phylogenetic methods do not occur when population sizes are so large that  $N_e \mu \gg 1$ .

The model is of a biallelic locus in a haploid population with constant size  $N$ . Mutation between the alleles is symmetric at rate  $\mu$ . The relative fitnesses of the alleles are  $1 :: 1 + s$ . We assume the classic Wright-Fisher model of drift.

Wright (1, 2) found that the stochastic equilibrium distribution of allele frequencies is

where  ${}_0F_1(\cdot, \cdot)$  is the regularized confluent hypergeometric function (3). The expected molecular diversity is then

where

$$a = 2 N_e \mu + \frac{1}{2}, \quad b = 2 N_e \mu - \frac{1}{2},$$

and  $I_n(z)$  is the modified Bessel function of the first kind (3). Figure 1 in the main text is based on Equation (A1.2).

## SI 2: The *TreeFree* algorithm

545

546

547

548

549

550

551

552

553

554

555

556

557

558

559

560

561

562

563

564

565

566

567

568

569

570

571

572

573

574

575

576

577

578

579

580

581

582

583

584

585

586

587

Our goal is the inference of the frequencies of ecotypes present in our sample and the genome sequences of those ecotypes. As *Prochlorococcus* has an extraordinarily large population size (4), we hypothesize that the frequencies of genotypes within an ecotype are determined by a mutation-selection balance, with most sites in most genomes carrying the reference allele for its ecotype. Accordingly, we designed an algorithm which clusters the genotypes into ecotypes based on sequence similarity in a manner similar to *structure* (5). The algorithm is described in the following, and is summarized with pseudocode in the last section of this appendix.

As in the main text, we use the following notation to describe our implementation:

- X** Data matrix of genome sequences, with  $X_{ik}$  equal to the allele observed at the  $k^{\text{th}}$  site in the  $i^{\text{th}}$  sequence.
- J** Number of ecotypes in the model
- G** Reference sequences for the ecotypes, with  $G_{jk}$  equal to the allele at the  $k^{\text{th}}$  site in the  $j^{\text{th}}$  ecotype
- f** Vector of estimated ecotype frequencies, with  $f_j$  equal to the frequency of the  $j^{\text{th}}$  ecotype
- K** Total number of SNPs in the sample
- $m_{ij}$  Number of sites at which the allele at site  $i$  and ecotype  $j$
- $q$  Minor allele frequency at all sites

We begin by assuming that each genotype in the sample comes from a different ecotype, and that the reference genome sequence for that ecotype is exactly equal to the sequence of that genotype. (This is the value of **G** with the highest likelihood.)

We then decrease the number of ecotypes ( $J$ ) to force multiple genotypes to be clustered within ecotypes, then use an iterative method to approximate the highest likelihood value of **G** given  $J$ . This scheme is composed of two alternating step. First, a Metropolis-Hastings MCMC step is used to adjust the frequencies of the ecotypes (the  $f_j$ ). Second, a Gibbs MCMC step updates the ecotype genome sequences **G**, conditioned on their frequencies. These steps are described in more detail in the following section.

### S2.1 Metropolis-Hastings MCMC

We use the Metropolis-Hastings MCMC algorithm to explore the space of possible frequency vectors. We start with a vector  $\mathbf{f}^{(0)}$  in which all ecotypes are equally frequent (*i.e.*, the entries of  $\mathbf{f}^{(0)}$  are all equal to  $1/N$ ). Next we generate a sequence of frequency vectors  $\mathbf{f}^{(1)}, \mathbf{f}^{(2)}, \dots, \mathbf{f}^{(n)}$  using the following rules. Per the Metropolis-Hastings algorithm, we pick a proposed vector  $\mathbf{f}^{(n+1)}$  near to  $\mathbf{f}^{(n)}$ , then decide whether or not to accept or reject the proposal with probability proportional

588 to the product of the ratio of likelihoods and the probability of sampling one  $\mathbf{f}$  vector  
 589 given the other. Formally, holding  $\mathbf{G}$  (the genome sequences for the ecotypes) fixed,  
 590 we compute:

$$591 \chi = \frac{L(X | \mathbf{f}^{(n+1)})}{L(X | \mathbf{f}^{(n)})} \times \frac{P(\mathbf{f}^{(n)} | \mathbf{f}^{(n+1)})}{P(\mathbf{f}^{(n+1)} | \mathbf{f}^{(n)})}. \quad (\text{A2.1})$$

593  
 594 In this equation the likelihood terms are the same as in Equation (1) of the main  
 595 text, and  $P(\mathbf{f}^{(n+1)} | \mathbf{f}^{(n)})$  is the probability that we accept the proposed frequency  
 596 vector  $\mathbf{f}^{(n+1)}$ . We sample these proposals from a Dirichlet distribution:  
 597

$$598 P(\mathbf{f}^{(n+1)} | \mathbf{f}^{(n)}) = \frac{\prod_{i=1}^K \mathbf{f}^{(n+1)} f_i^{(n)-1}}{[\prod_{i=1}^K \Gamma(\mathbf{f}_i^{(n)})] / [\Gamma(\sum_{i=1}^K \mathbf{f}_i^{(n)})]}, \quad (\text{A2.2})$$

599  
 600 where  $\Gamma(\cdot)$  is the gamma function. We accept a proposed frequency vector  $\mathbf{f}^{(n+1)}$   
 601 with probability  $\chi$ , and retain the current vector  $\mathbf{f}^{(n)}$  with probability  $(1 - \chi)$ .

602 By initializing our MCMC sampler with the value of  $\mathbf{G}$  that maximizes the  
 603 likelihood, we minimize the burn-in phase for each following value of  $J$ . To  
 604 encourage the sampler to sample away from vectors with zero-valued entries, we  
 605 bounded sampled values from below at a frequency of one individual per million,  
 606 well below our expected resolution given our sample size.

## 607 S2.2 Gibbs MCMC

609 To optimize the matrix of reference sequences,  $\mathbf{G}$ , we will use a different MCMC  
 610 algorithm, the Gibbs sampler. It is well suited for dealing with the categorical nature  
 611 of the ecotype genome sequences.

612 We sample the elements of  $\mathbf{G}$  one at a time. For each element, we calculate the  
 613 likelihood for all four possible bases, and choose among these proposals with  
 614 probabilities proportional to their likelihoods.

615 To minimize the numerical burden, we observe that the likelihood (see  
 616 Equation 1) can be written as:

$$617 L = q^K \prod_{i=1}^N \sum_{j=1}^J f_j \left(\frac{1-q}{q}\right)^{m_{ij}}. \quad (\text{A2.3})$$

619 This formulation is convenient because  $m_{ij}$  can only change by one when a base in a  
 620 reference sequence is changed. We can further reduce computation by fixing the  
 621 ecotype  $j$ . Then the likelihoods for all possible alleles at all the sites in that ecotype  
 622 are given by  
 623

$$624 L_j \propto \prod_{i=1}^N \left[ f_j \left(\frac{1-q}{q}\right)^{m_{ij}} + \sum_{j' \neq j} f_{j'} \left(\frac{1-q}{q}\right)^{m_{ij'}} \right]. \quad (\text{A2.4})$$

626  
 627 This is useful because the second of the two terms inside the square brackets is  
 628 constant with  $j$  fixed. Consequently, that term can be calculated once and used for

629 all the sites within ecotype  $j$ .

630

### 631 S2.3 Transitions Between Models

632 After each set of M-H and Gibbs MCMC steps, we decrement  $J$  to force  
633 clustering of the samples into fewer ecotypes. To define the starting point for the  
634 next set of MCMC steps, we remove the ecotype which has the smallest effect on the  
635 total likelihood when we reapportion its frequency proportionally to the inverse of  
636 the Hamming distance between that ecotype and the remaining ecotypes. That is, to  
637 remove ecotype  $j$  we set

638

$$639 \mathbf{G}^{(J-1)} = \mathbf{G}^{(J)} \setminus \mathbf{G}_j \tag{A2.5}$$

640

641

$$f_i^{(J-1)} = \frac{f_i^{(J)} D(i, j)}{\left(\sum_{k \neq j} D(k, j)\right) \left(\sum_k f_k^{(J-1)}\right)}$$

642

643 where  $D(i, j)$  is the Hamming distance between ecotypes  $i$  and  $j$ . We calculated the  
644 likelihood with each ecotype removed, and finally removed the ecotype which  
645 resulted in the smallest change to the likelihood.

646

### 647 S2.4 Estimating the number of ecotypes

648 Our parameter space is too rich to use standard information criterion tests  
649 such as AIC and BIC to choose between alternative estimates of  $\mathbf{f}$  and  $\mathbf{G}$ . We  
650 therefore use a simple likelihood ratio test. At each Gibbs step, we found the  
651 maximum likelihood among all of the Metropolis-Hastings steps. We then compared  
652 these likelihoods among successive Gibbs steps using a likelihood ratio test a  
653 difference in the number of parameters equal to the sequence length. Each step  
654 resulting in a significant drop in the likelihood (at  $p < 0.05$ ) indicates that a true  
655 ecotype has been removed.

656 The rationale for this procedure is as follows. Consider when there are in fact  $J$   
657 “true” ecotypes, but we are at the Gibbs step with  $J + 1$  potential ecotypes. In that  
658 case, one of the potential ecotypes is comprised of individuals that in fact belong to  
659 one of the  $J$  true ecotypes. We then expect that its reference sequence will be very  
660 similar to that true ecotype. Consequently, assigning the individuals in that  
661 potential ecotypes to its true ecotype will result in a small and insignificant drop in  
662 likelihood. Conversely, when a Gibbs step removes a true ecotype, we expect the  
663 drop in likelihood to be significant. Thus the number of Gibbs steps that result in  
664 significant drops in likelihood provides an estimate of the number of real ecotypes  
665 in the sample. This sequential pruning of “centers” of potential ecotype is analogous  
666 to the “mean shift” procedure that is widely used in pattern recognition (6).

667

668

### 669 S2.5 The *TreeFree* algorithm

```
670 Input:  $\mathbf{X}$ , the set of sampled individual genomes
671  $\mathbf{G} \ni \mathbf{X}$ 
672  $J \ni N$ 
673  $f_i \ni 1/N$ 
674 while  $J > 1$  do
675      $\mathbf{f} \ni \arg \max_{\mathbf{f}} L(\mathbf{f} | \mathbf{X}, \mathbf{G})$            Optimize  $\mathbf{f}$  using M-H MCMC (Section S2.1)
676      $\mathbf{G} \ni \arg \max_{\mathbf{G}} L(\mathbf{G} | \mathbf{X}, \mathbf{f})$          Optimize  $\mathbf{G}$  using Gibbs MCMC (Section S2.2)
677      $J \ni \arg \max_j L(\mathbf{X} | \mathbf{f} \setminus f_j, \mathbf{G} \setminus G_j)$  Determine which ecotype's removal results in
678                                     smallest decrease in likelihood (Section 1.3).
679      $\mathbf{G} \ni \mathbf{G} \setminus G_j$ 
680      $J \ni J - 1$ 
681      $\mathbf{f} \ni \mathbf{f} \setminus f_j$            Reapportion the frequency lost by removing the
682                                     ecotype
683 end
684 return  $\{\mathbf{f}, \mathbf{G}\}$ 
685
```

### SI 3: Details of the BPP Methods

686

687

688

689

690

691

692

693

694

695

696

697

698

699

700

701

702

703

704

705

706

707

708

709

710

711

712

713

714

715

716

717

718

719

720

721

722

723

724

725

726

727

728

729

Bayesian Phylogenetics and Phylogeography (BPP) is a Bayesian Markov Chain Monte Carlo (MCMC) method for sequence-based species (here, ecotype) delimitation under the multispecies coalescent model (7, 8).

In BPP, the user assigns individuals to populations, the finest feasible division of individuals into ecotypes, and provides a guide tree which serves as a preliminary phylogeny for these populations. BPP may join multiple populations into a single ecotype or call a single population an ecotype, but it will never split a population into multiple ecotypes. BPP has four major categories of analysis, each defined by whether the guide tree and ecotype delimitation are fixed. The analysis we conducted (called A11, or unguided species delimitation) conducts joint ecotype delimitation and ecotype tree inference, meaning that neither is fixed (8). It does this inference through a two-step MCMC algorithm. One step, nearest-neighbor interchange, is used to move between ecotype phylogenies while holding the delimitation constant. The second, reversible-jump MCMC, is used to consider changes to the ecotype delimitations by joining and splitting nodes in the population phylogeny. This process may join two sister populations into a single ecotype, but it will never split a single population into multiple ecotypes. See Yang and Rannala (8) for more details on this method.

We used subsets of the whole genome sequences because use of the entire dataset was computationally prohibitive. We subsetted the data in twelve different ways. Nine of these used the intergenic transcribed spacer sequences (549 bp), one used 10% of all the whole genome sequences (162 kbp), one used 0.1% of all the whole genome sequences (1.6 kbp), and one used the whole genome sequences from only 9 individuals (1.6 Mbp). Details and results of these analyses are in Table S3.1. For all but the analyses of the ITS data, we used the same set of fundamental BPP parameters (Table S3.2). For the analyses of the ITS data, we sought to test the limits of BPP on prokaryotic data. We did this by changing the following: which individuals we included in our analysis (the entire population, only individuals from a single clade, individuals from a few disparate clades, etc.), how we assigned individuals to populations (large populations, every individual in its own population, etc.), and the guide tree (realistic or very scrambled).

Two parameters that we never altered are the priors for  $\{\tau_s\}$  (the species divergence times expressed in mutations per base) and  $\{\theta_s\}$  (the average proportion of sites that are different between two randomly selected individuals in a population expressed in substitutions per site). We estimated the expected values of these distributions based on information from Kashtan *et al.* (p. 16 of their Supplemental Materials of ref. (9)). They estimated  $\theta = 0.05$  from a coalescent simulation of neutral evolution of the largest *Prochlorococcus* ecotype. This  $\theta$  value corresponded to a time to most recent common ancestor of  $2.5 \times 10^8$  generations, given  $\mu = 10^{-10}$  mutations per base per generation. We used this information to estimate the age of the root:  $\tau \approx (2.5 \times 10^8 \text{ generations}) \times (10^{-10} \text{ mutations / base / generation}) = 0.025 \text{ mutations / base}$  (9). Consequently, we selected parameters



730 for the inverse-gamma prior for  $\tau_s$  and  $\theta_s$  such that  $E[\tau_s] = 0.025$  and  $E[\theta_s] = 0.05$ .  
731 The important BPP parameters are described in Table S3.2.  
732

733 **Table SI 3.1 Results of Twelve BPP Analyses**

734 Each row describes a different BPP analysis. The first column shows the data used  
 735 (ITS data or a subset of the whole genome sequence data) and the number of  
 736 individual cells included. The second column gives the sequence length for the data  
 737 analyzed. The third column describes how the cells were allocated into prior  
 738 populations for the BPP analysis. (Recall that these prior populations can be  
 739 merged but not subdivided by BPP; see Appendix 3 for more details.) See Figure 2  
 740 for a depiction of the guide tree used for all analyses unless otherwise noted and the  
 741 definitions of the original clades (e.g., C1, c9301-C8, etc.). The final two columns give  
 742 the results of each analysis: the posterior probability assigned to each number of  
 743 possible ecotypes, and the ecotype delimitation with the highest posterior  
 744 probability. The ecotype with the highest posterior probability is indicated as a list  
 745 of ecotypes, with the plus sign indicating that two prior populations have been  
 746 merged into one ecotype in the final delimitation. Note that the single ecotype  
 747 delimitation with the highest posterior probability does not necessarily align with  
 748 the highest posterior probability number of ecotypes, which accounts for all  
 749 possible delimitations with a given number of ecotypes. See Figure 3 for the full  
 750 posterior probability distributions for the analyses in rows 1, 2, and 4.

751  
 752

| Row | Data Analyzed (n = # of cells) | Sequence Length (bp) | Description of Prior Population Assignment                    | # of Ecotypes (Post. Prob.)                         | Ecotype delimitation with highest posterior probability (+ indicates ecotype merging)                        |
|-----|--------------------------------|----------------------|---------------------------------------------------------------|-----------------------------------------------------|--------------------------------------------------------------------------------------------------------------|
| 1   | 10% of whole genome (n=96)     | 162,677              | Split all large clades in half (e.g., C1 = C1, C1A)           | 13 (0.34),<br>14 (0.34),<br>15 (0.20)               | <b>13 ecotypes:</b> C1+C1A, C2+C2A, UC6, UC1, C3, C3A, C5, C5A, UC2, UC5, C4+C4A, c9301-C8, cN1-C9           |
| 2   | 0.1% of Whole Genome (n=96)    | 1,627                | Split all large clades in half (e.g., C1 = C1, C1A)           | 12 (0.19),<br>13 (0.31),<br>14 (0.28)               | <b>14 ecotypes:</b> C1, C1A, C2+C2A, UC6, UC1, C3, C3A, C5, C5A, UC2, UC5, C4+C4A, c9301-C8, cN1-C9          |
| 3   | 100% of whole genome (n=9)     | 1,650,354            | 9 individuals: 2 from each of C1, C1A, C2, and C2A; CN1-C9    | 3 (0.47), 4 (0.35)                                  | <b>3 ecotypes:</b> C1+C1A, C2+C2A, cN1-C9                                                                    |
| 4   | ITS (n=101)                    | 549                  | Split all large clades except C5 in half (e.g., C1 = C1, C1A) | 11 (0.15),<br>12 (0.20),<br>13 (0.21),<br>14 (0.16) | <b>14 ecotypes:</b> C1+C1A, C2+C2A, UC6, UC1, C3+C3A, C5, UC7, UC2, UC5, C4+C4A, MIT2, c9301-C8, cN1-C9, MIT |
| 5   | ITS (n=101)                    | 549                  | Same as above, but with very scrambled guide tree             | 11 (0.16),<br>12 (0.19),<br>13 (0.18),<br>14 (0.14) | <b>10 ecotypes:</b> C1+C1A, C2+C2A, UC6+UC1+C5+UC2+C4+C4A, C3+C3A, UC7, UC5, MIT2, c9301-C8, cN1-C9, MIT     |
| 6   | ITS (n=64)                     | 549                  | Assign every cell from C1, C2 to own population (64 total)    | Error                                               |                                                                                                              |
| 7   | ITS (n=55)                     | 549                  | Assign every cell from C1 to own                              | Error                                               |                                                                                                              |

|    |               |     | population (55 total)                                                    |                                    |                                                    |
|----|---------------|-----|--------------------------------------------------------------------------|------------------------------------|----------------------------------------------------|
| 8  | ITS<br>(n=13) | 549 | Assign every cell from C3 to own population (1 through 13)               | 1 (0.995)                          | <b>1 ecotype:</b><br>1+2+3+4+5+6+7+8+9+10+11+12+13 |
| 9  | ITS<br>(n=64) | 549 | C1 (n=55) split into 5 populations (A,B,C,D,E); C2 (n=9)                 | 2 (0.945),<br>3 (0.05)             | <b>2 ecotypes:</b> A+B+C+D+E, C2                   |
| 10 | ITS<br>(n=64) | 549 | C1 (n=55) split into 2 pops (A,C); C2 (n=9)                              | 2 (0.94), 3<br>(0.06)              | <b>2 ecotypes:</b> A+C, C2                         |
| 11 | ITS<br>(n=64) | 549 | C1 (n=55) split into 3 populations (A,C,E); C2 (n=9)                     | 2 (0.94), 3<br>(0.06)              | <b>2 ecotypes:</b> A+C+E, C2                       |
| 12 | ITS<br>(n=77) | 549 | C1 (n=55) split into 3 populations (C1, 10C1A, C1B); C2 (n=9); C3 (n=13) | 3 (0.13), 4<br>(0.38), 5<br>(0.50) | <b>5 ecotypes:</b> C1A, C1B, C1, C2, C3            |

753  
754

755 **Table SI 3.2 BPP Parameters**

756 Typical parameter values used to run BPP analyses. Note that the mean of  $\theta$  and  $\tau_s$   
 757 (root age) prior distributions were informed by the neutral coalescent simulation  
 758 run by Kashtan et al. (9) which sought to mimic characteristics of *Prochlorococcus*  
 759 (section 6.2 of the Supplemental Information of ref. (9)).  $E[\theta] = 0.05$ ,  $E[\tau_s] = 0.025$   
 760 mutations/base.  
 761

| Code in BPP Ctl File                                                          | Meaning                                                                                                                                                                                                                |
|-------------------------------------------------------------------------------|------------------------------------------------------------------------------------------------------------------------------------------------------------------------------------------------------------------------|
| Speciesdelimitation = 1 1 2 1                                                 | First "1" means species assignments are not given by the user. Subsequent values specify rjMCMC algorithm and parameters.                                                                                              |
| Speciestree = 1 0.4 0.2 0.1                                                   | First "1" means the given species tree is used as the guide tree in the rjMCMC run for species delimitation. Subsequent values are parameters.                                                                         |
| Speciesmodelprior = 3                                                         | Each number of species is assigned an equal prior probability; probability divided uniformly among compatible models of species delimitation. (Best choice when many populations; avoids biasing towards many species) |
| Cleandata = 0                                                                 | Includes columns with ambiguity data in the likelihood calculation                                                                                                                                                     |
| Thetaprior = 3 0.1<br>( $\theta \sim \text{IG}(3, 0.1)$ , $E[\theta]=0.05$ )  | Theta parameters estimated (rather than being integrated out using conjugate prior) according to an inverse gamma prior                                                                                                |
| Tauprior = 3 0.05<br>( $\tau_s \sim \text{IG}(3, 0.05)$ , $E[\tau_s]=0.025$ ) | Specifies inverse gamma prior for $\tau_s$ , the divergence time parameter for the root in the species tree.                                                                                                           |
| finetune = 1: .01 .02 .03 .04 .05 .01<br>.01                                  | First "1" specifies to automatically adjust MCMC step lengths. Subsequent values are initial step lengths for various parameters.                                                                                      |

762

763  
764  
765  
766  
767  
768  
769

#### SI 4: Results of *TreeFree*

The sample IDs and clade assignment of *Prochlorococcus* genomes from Kashtan *et al.* (9). The last two columns show the ecotype to which *TreeFree* assigned each genome with highest posterior probability based on either 10% or 0.1% of the sequences.

| Sample ID | Clade | 10% | 0.1% |
|-----------|-------|-----|------|
| 526B17    | C1    | 4   | 0    |
| 526B19    | UC    | 4   | 0    |
| 526B22    | C1    | 4   | 0    |
| 526D20    | C1    | 4   | 0    |
| 526K3     | C1    | 4   | 0    |
| 526N5     | C5    | 4   | 0    |
| 526N9     | C1    | 4   | 0    |
| 527E14    | C2    | 22  | 0    |
| 527E15    | C3    | 9   | 0    |
| 527G5     | C1    | 4   | 0    |
| 527I9     | C1    | 0   | 0    |
| 527L15    | C1    | 4   | 0    |
| 527L16    | C1    | 20  | 0    |
| 527L22    | c9301 | 10  | 2    |
| 527N11    | C1    | 1   | 0    |
| 527P5     | C1    | 23  | 0    |
| 528J14    | C2    | 22  | 0    |
| 528J8     | cN1   | 8   | 0    |
| 528K19    | C1    | 1   | 0    |
| 528N17    | C4    | 11  | 0    |
| 528N20    | C1    | 13  | 0    |
| 528N8     | C1    | 18  | 0    |
| 528O2     | UC    | 4   | 6    |
| 528P14    | c9301 | 10  | 2    |
| 528P18    | C3    | 2   | 5    |
| 529B19    | C1    | 16  | 0    |
| 529C4     | C1    | 3   | 0    |
| 529D18    | C3    | 2   | 5    |
| 529J11    | C1    | 4   | 0    |
| 529J15    | C3    | 9   | 5    |
| 529J16    | C1    | 4   | 0    |
| 529O19    | C1    | 0   | 0    |
| 495D8     | UC    | 4   | 0    |
| 495G23    | UC    | 4   | 0    |
| 495I8     | C1    | 4   | 0    |

|        |       |    |   |
|--------|-------|----|---|
| 495K23 | C1    | 7  | 0 |
| 495L20 | C3    | 2  | 5 |
| 495N16 | C1    | 20 | 0 |
| 495N3  | C4    | 5  | 0 |
| 495N4  | C1    | 18 | 0 |
| 495P20 | UC    | 6  | 0 |
| 496A2  | C3    | 2  | 5 |
| 496E10 | C1    | 7  | 0 |
| 496G15 | C2    | 4  | 0 |
| 496M6  | UC    | 4  | 0 |
| 496N4  | C1    | 13 | 0 |
| 497E17 | cN1   | 8  | 0 |
| 497I20 | C1    | 4  | 0 |
| 497J18 | C3    | 9  | 5 |
| 497N18 | UC    | 22 | 0 |
| 498A3  | c9301 | 10 | 3 |
| 498B22 | C2    | 22 | 0 |
| 498B23 | C4    | 11 | 0 |
| 498C16 | C2    | 22 | 0 |
| 498F21 | C1    | 12 | 0 |
| 498G3  | C1    | 4  | 0 |
| 498I20 | C5    | 4  | 1 |
| 498J20 | C1    | 4  | 0 |
| 498L10 | C1    | 13 | 0 |
| 498M14 | C1    | 4  | 0 |
| 498N4  | C3    | 2  | 5 |
| 498N8  | C2    | 22 | 0 |
| 498P15 | C1    | 14 | 0 |
| 498P3  | C1    | 16 | 0 |
| 518A17 | C3    | 2  | 5 |
| 518A6  | C3    | 2  | 5 |
| 518D8  | C1    | 15 | 0 |
| 518E10 | C1    | 4  | 0 |
| 518I6  | C5    | 4  | 4 |
| 518J7  | C3    | 2  | 5 |
| 518K17 | C1    | 16 | 0 |
| 518O7  | C1    | 4  | 0 |
| 519A13 | UC    | 4  | 0 |
| 519B7  | C4    | 5  | 0 |
| 519C7  | C1    | 17 | 0 |
| 519D13 | C1    | 1  | 0 |
| 519E23 | C1    | 21 | 0 |
| 519G16 | C3    | 2  | 5 |

|        |       |    |   |
|--------|-------|----|---|
| 519L21 | C1    | 4  | 0 |
| 519O11 | C1    | 20 | 0 |
| 519O21 | c9301 | 10 | 2 |
| 520B18 | C1    | 0  | 0 |
| 520D2  | C1    | 19 | 0 |
| 520E22 | C1    | 7  | 0 |
| 520F22 | C2    | 22 | 0 |
| 520K10 | cN1   | 8  | 0 |
| 520M11 | C2    | 22 | 0 |
| 521A19 | C1    | 1  | 0 |
| 521B10 | C1    | 23 | 0 |
| 521C8  | C3    | 2  | 0 |
| 521K15 | C1    | 21 | 0 |
| 521M10 | C1    | 16 | 0 |
| 521N3  | C1    | 18 | 0 |
| 521N5  | C1    | 4  | 0 |
| 521O20 | C1    | 20 | 0 |
| 521O23 | C1    | 0  | 0 |

770  
771

772 SI REFERENCES

773

- 774 1. Wright S. Evolution in Mendelian populations. *Genetics*. 1931;16:97-159.
- 775 2. Wright S. The differential equation of the distribution of gene frequencies. *Proc*  
776 *Natl Acad Sci USA*. 1945;31(12):382-9.
- 777 3. Wolfram Research. *Mathematica*. Version 12.0 ed. Champaign, IL: Wolfram  
778 Research, Inc.; 2014.
- 779 4. Chisholm SW, Olson RJ, Zettler ER, Goericke R, Waterbury JB, Welschmeyer NA. A  
780 novel free-living prochlorophyte abundant in the oceanic euphotic zone. *Nature*.  
781 1988;334(6180):340-3.
- 782 5. Pritchard JK, Stephens M, Donnelly P. Inference of population structure using  
783 multilocus genotype data. *Genetics*. 2000;155(2):945-59.
- 784 6. Fukunaga K, Hostetler LD. Estimation of the gradient of a density function, with  
785 applications in pattern recognition. *IEEE Transactions on Information Theory*.  
786 1975;21(1):32-40.
- 787 7. Rannala B, Yang ZH. Bayes estimation of species divergence times and ancestral  
788 population sizes using DNA sequences from multiple loci. *Genetics*.  
789 2003;164(4):1645-56.
- 790 8. Yang ZH, Rannala B. Unguided species delimitation using DNA sequence data  
791 from multiple loci. *Mol Biol Evol*. 2014;31(12):3125-35.
- 792 9. Kashtan N, Roggensack SE, Rodrigue S, Thompson JW, Biller SJ, Coe A, et al.  
793 Single-cell genomics reveals hundreds of coexisting subpopulations in wild  
794 *Prochlorococcus*. *Science*. 2014;344(6182):416-20.

795

796
